# Supplementary material
Source: publisher figshare collection journal article supplement (https://karger.figshare.com/ndownloader/files/8716807)
Supplement: Supplementary file 1 [file 8716807]

## **SUPPLEMENTARY MATERIAL**

### **Identification of Diagnosis-based Outcomes**

#### Coding Practices

Trained personnel assign standardized codes based on physician-recorded diagnoses in a patient's medical chart, but do not interpret any laboratory tests. For hospitalization records, up to 25 diagnostic codes can be assigned per hospitalization. As such, patients with codes for multiple study outcomes were accounted for in the assessment of each outcome.

#### Myocardial Infarction and Heart Failure

We defined myocardial infarction (ICD-9 codes 410, ICD-10 codes I21, I22) and heart failure (ICD-9 code 428, ICD-10 codes I500) when their codes appeared in the Most Responsible Diagnosis field of the CIHI-DAD. This field records the single diagnosis that contributed most to the patient's length of stay in hospital.

#### Ventricular Arrhythmia

For ventricular arrhythmia however (ICD-9 code 4271, ICD-10 code I490) we chose to maximize the sensitivity of the codes by accepting codes recorded in any of the diagnostic fields

### **Covariates Used in the Logistic Regression Analysis**

#### Baseline variables

Age, year of cohort entry, sex, comorbid conditions (coronary artery disease, peripheral vascular disease, abdominal aortic aneurysm, diabetes mellitus, heart failure, stroke or transient ischemic attack).

#### General measures of comorbidity

Duration on dialysis, receipt of echocardiogram, Holter monitoring or stress testing.

#### Concomitant medications

Angiotensin receptor blockers, beta blockers, calcium channel blockers, statins).
